# Supplementary material
Source: Springer Nature journal article supplement (https://www.springermedizin.de/resource/supplementary/12877_2008_158_MOESM1_ESM.pdf/9441300)
Supplement: MOESM1 [file 9441300]

354 consecutive hip fracture patients (50 years+)

12 excluded:  
Malignancy (4)  
Trauma (2)  
Paget's Disease (5)  
Transfer to Outside Facility (1)

Total Study Cohort: N= 342  
256 Women  
86 Men

Previous OP Diagnosis/Treatment: n=95  
88 Women  
7 Men

No Previous OP Diagnosis/Treatment: n=247  
168 Women  
79 Men

Death prior to discharge: n=6

Survived to discharge: n=89

Orthopaedic Care Only n=59

Transfer to Rehab/Geriatrics: n=30

Death prior to discharge: n=23

Survived to discharge: n=224

Orthopaedic Care Only n=151

Transfer to Rehab/Geriatrics: n=73
